# Supplementary material for: Step-by-step monitoring of CVD-graphene during wet transfer by Raman spectroscopy
Source: Royal Society of Chemistry journal article supplement (doi:10.1039/c9ra09268d), 2019-01-01
Supplement: c9ra09268d1.pdf [file c9ra09268d1.pdf]

## Supplementary Information

### Step-by-Step Monitoring of CVD-Graphene during Wet Transfer by Raman Spectroscopy

*Zehao Wu<sup>a</sup>, Xuwei Zhang<sup>a</sup>, Atanu Das<sup>a</sup>, Jinglan Liu<sup>a</sup>, Zhenxing Zou<sup>a</sup>, Zilong Zhang<sup>a</sup>,  
Yang Xia<sup>b</sup>, Pei Zhao<sup>a,\*</sup>, Hongtao Wang<sup>a,\*</sup>*

*<sup>a</sup> Center for X-Mechanics and Institute of Applied Mechanics, Zhejiang University,  
Hangzhou 310012, P. R. China*

*<sup>b</sup> Institute of Microelectronics, Chinese Academy of Science, Beijing 100029, PR China*

\* Corresponding authors: [peizhao@zju.edu.cn](mailto:peizhao@zju.edu.cn) (P. Zhao), [htw@zju.edu.cn](mailto:htw@zju.edu.cn) (H. Wang)

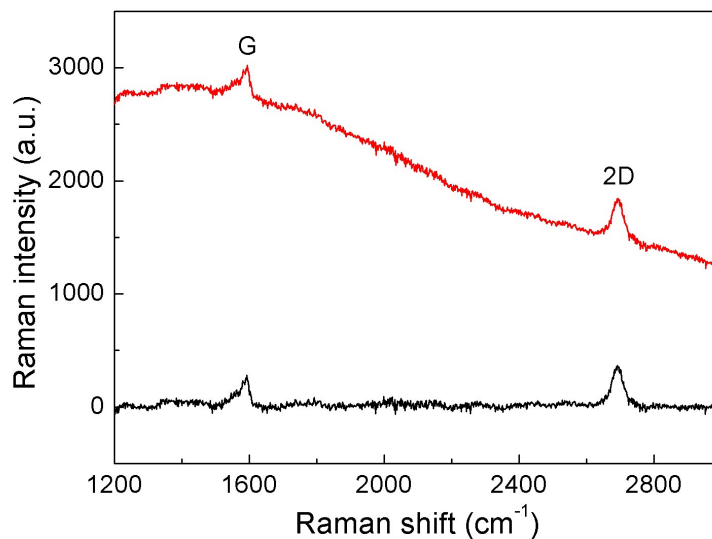

**Fig. S1.** The Raman spectra of graphene on Cu (red) and after the background subtraction (black). With a 532-nm excitation laser, Cu substrate shows a strong fluorescence background and without a precise determination of the background line, the positions and lineshapes of graphene's peaks are difficult to be analyzed.

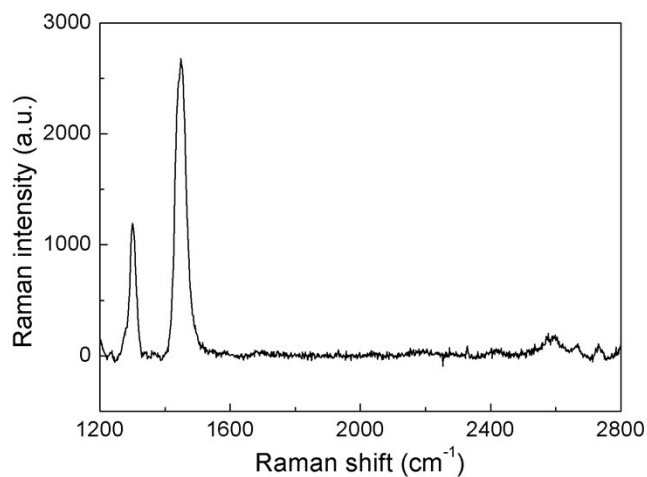

**Fig. S2.** The Raman spectrum of *n*-heptane, derived by directly measuring the liquid. It shows no overlap peaks for the graphene G-peak region. Moreover, when *n*-heptane is used in graphene transfer, the very small amount of *n*-heptane shows no observable peaks when compared with

that from graphene (as shown in Fig. 1c), therefore has no influence in the data analysis in the manuscript.
